# Supplementary material for: Transcriptional and Metabolomic Analysis of L-Arginine/Nitric Oxide Pathway in Inflammatory Bowel Disease and Its Association with Local Inflammatory and Angiogenic Response: Preliminary Findings
Source: PubMed Central journal article supplement (PMC7084352; doi:10.3390/ijms21051641), 2020-02-28
Supplement: ijms-21-01641-s001.pdf [file ijms-21-01641-s001.pdf]

## Supplementary Material

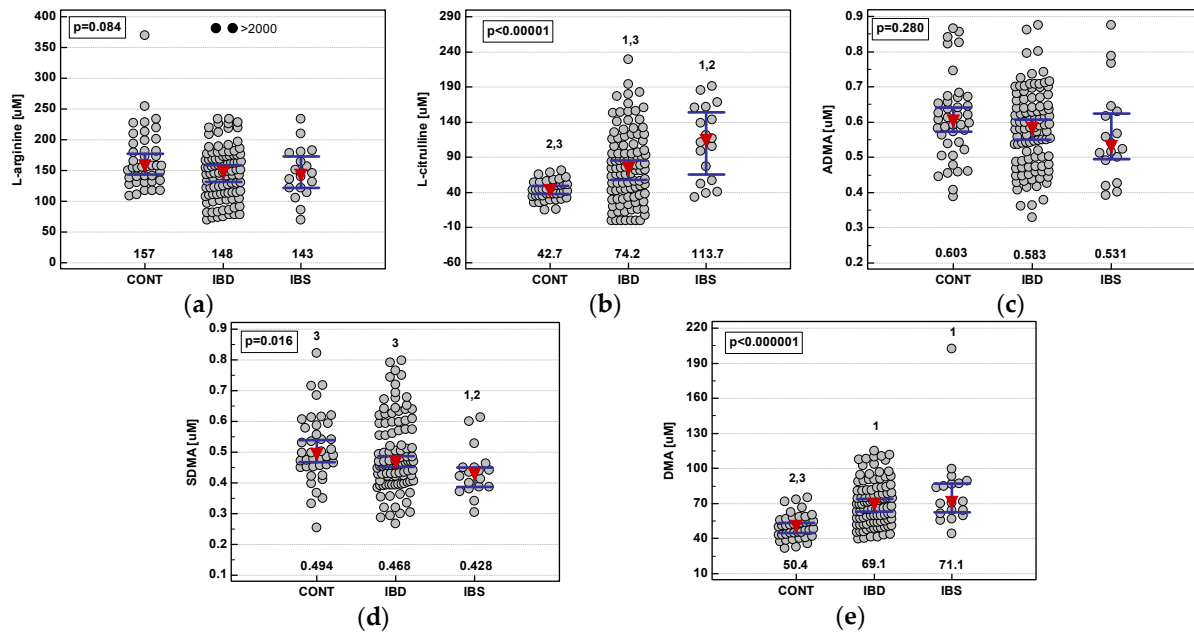

**Figure S1.** Systemic concentrations of L-arginine/NO pathway metabolites: (a) arginine; (b) citrulline; (c) asymmetric dimethylarginine; (d) symmetric dimethylarginine; (e) dimethylamine. CONT, healthy controls; IBD, inflammatory bowel disease; IBS, irritable bowel syndrome; 1, significantly different from CONT; 2, significantly different from IBD; 3, significantly different from IBS. Data analyzed using Kruskal-Wallis  $H$  test and presented as medians (red triangles, numbers below dot-plots) with 95% confidence interval (whiskers).

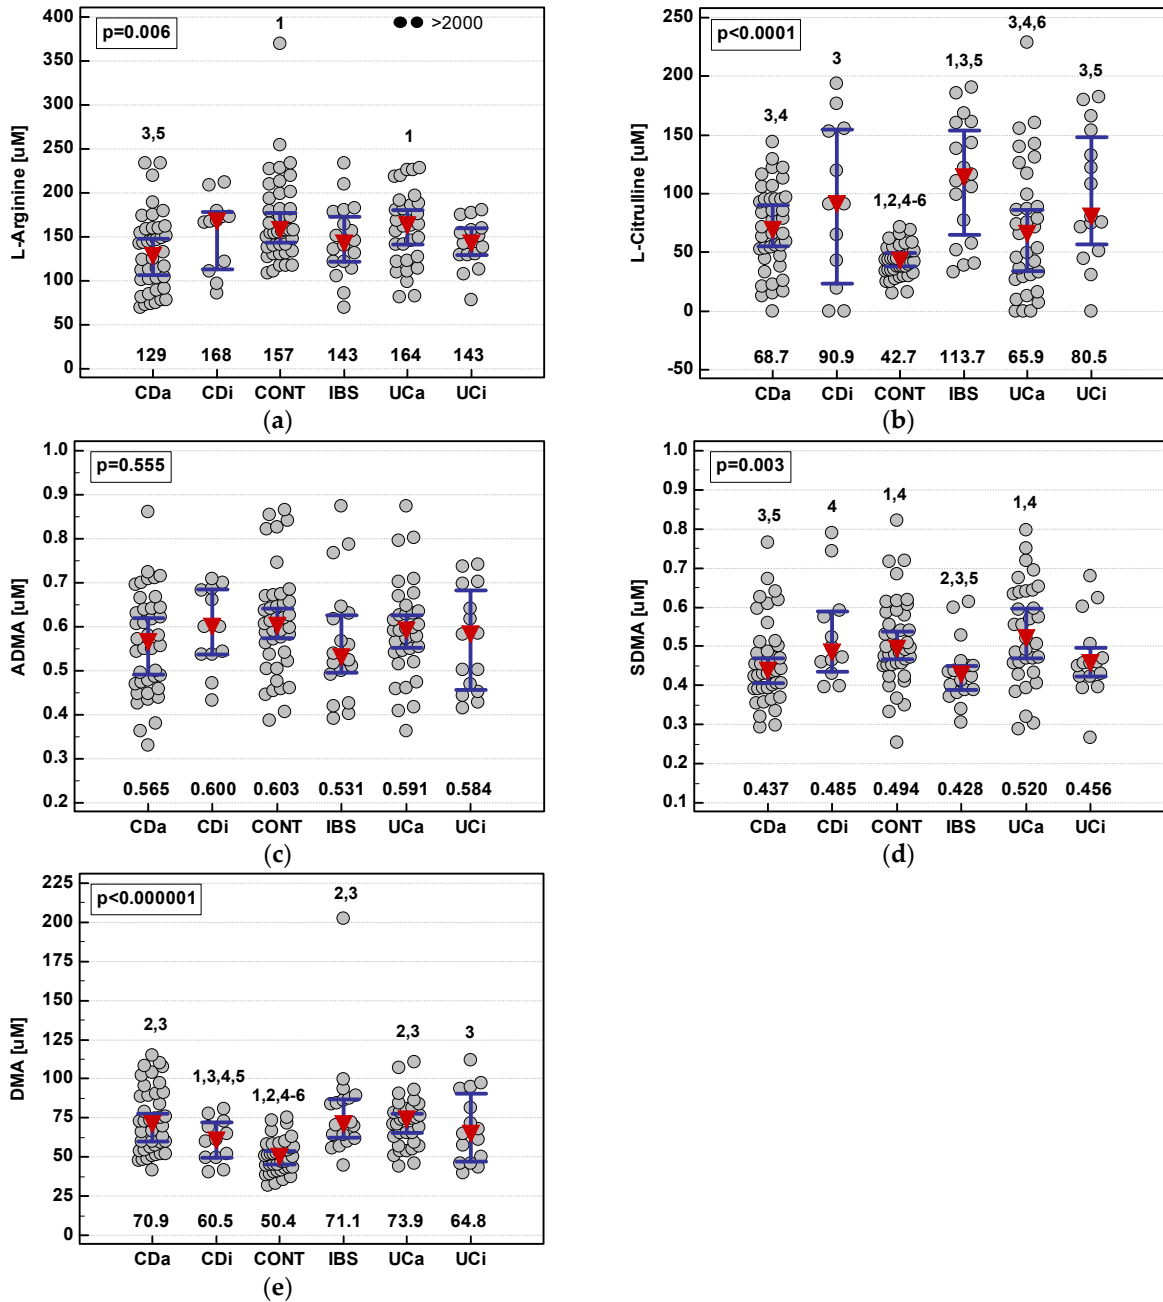

**Figure S2.** Systemic concentrations of L-arginine/NO pathway metabolites: (a) arginine; (b) citrulline; (c) asymmetric dimethylarginine; (d) symmetric dimethylarginine; (e) dimethylamine. CDa, active Crohn's disease; CDi, inactive Crohn's disease; CONT, healthy controls; IBS, irritable bowel syndrome; UCa, active ulcerative colitis; UCi, inactive ulcerative colitis; 1, significantly different from CDa; 2, significantly different from CDi; 3, significantly different from CONT; 4, significantly different from IBS; 5, significantly different from UCa; 6, significantly different from UCi. Data analyzed using Kruskal-Wallis *H* test and presented as medians (red triangles, numbers below dot-plots) with 95% confidence interval (whiskers).

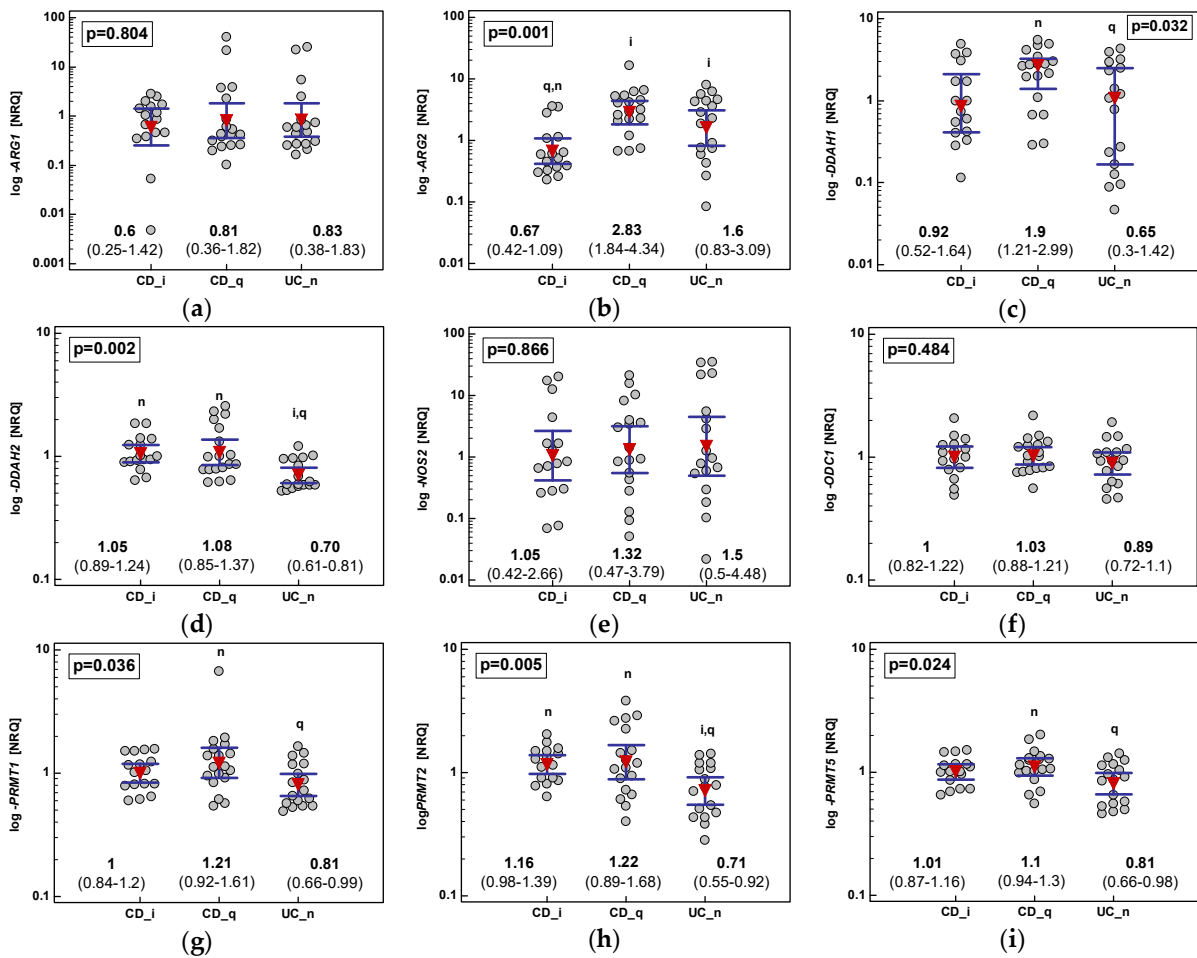

**Figure S3.** L-arginine/NO pathway-associated enzymes in inflamed and quiescent small bowel: (a) ARG1; (b) ARG2; (c) DDAH1; (d) DDAH2; (e) NOS2; (f) ODC1; (g) PRMT1; (h) PRMT2; (i) PRMT5. Data presented as geometric means of normalized relative quantities (NRQ) with 95% confidence interval (CI) and analyzed using one-way ANOVA. CD\_i, inflamed tissue obtained from CD patients; CD\_q, quiescent tissue obtained from CD patients; UC\_n, normal small bowel tissue obtained from UC patients; n, significantly different from UC\_n; q, significantly different from CD\_q; i, significantly different from CD\_i.

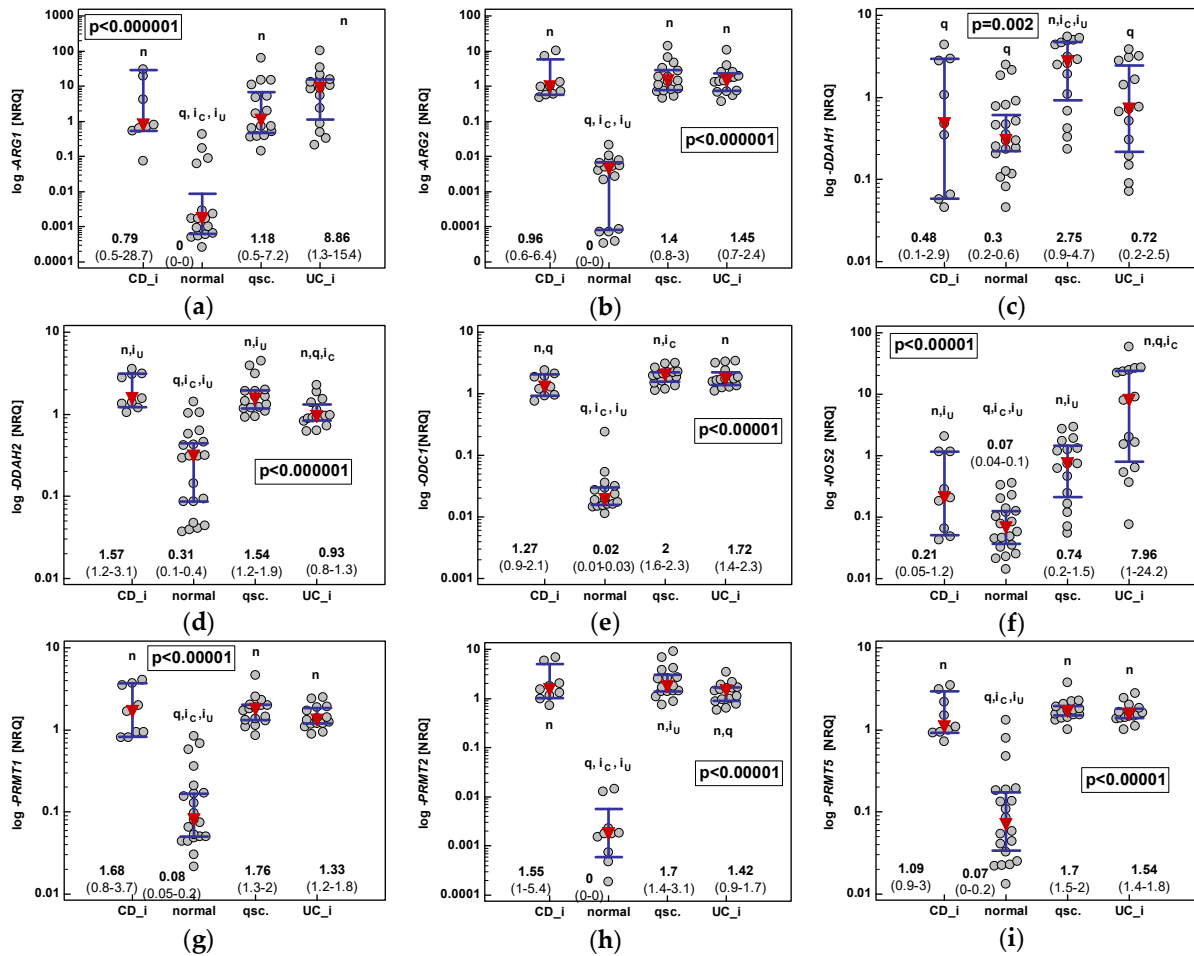

**Figure S4.** L-arginine/NO pathway-associated enzymes in inflamed and quiescent large bowel: (a) ARG1; (b) ARG2; (c) DDAH1; (d) DDAH2; (e) NOS2; (f) ODC1; (g) PRMT1; (h) PRMT2; (i) PRMT5. Data presented as medians of normalized relative quantities (NRQ) with 95% confidence interval (CI) and analyzed using Kruskal-Wallis  $H$  test. CD\_i, inflamed tissue obtained from CD patients; qsc., quiescent tissue obtained from CD patients; UC\_i, inflamed tissue obtained from UC patients; normal, normal large bowel tissue obtained from patients undergoing polypectomy; n, significantly different from normal; q, significantly different from qsc.; ic, significantly different from CD\_i; iu, significantly different from UC\_i.
